# Supplementary material for: Characteristics of nonconventional hydrogen bonds and stability of dimers of chalcogenoaldehyde derivatives: a noticeable role of oxygen compared to other chalcogens
Source: Royal Society of Chemistry journal article supplement (doi:10.1039/d4ra01837k), 2024-01-01
Supplement: d4ra01837k1.pdf [file d4ra01837k1.pdf]

## Characteristics of nonconventional hydrogen bonds and stability of dimers of chalcogenoaldehyde derivatives: a noticeable role of oxygen compared to other chalcogens

Le Thi Tu Quyen,<sup>1</sup> Bui Nhat Tung,<sup>1</sup> Pham Ngoc Thach<sup>1,2</sup> Nguyen Ngoc Tri,<sup>1,2</sup> Nguyen Tien Trung<sup>\*1,2</sup>

<sup>1</sup>Laboratory of Computational Chemistry and Modelling (LCCM), Quy Nhon University, 170 An Duong Vuong Street, Quy Nhon City 590000, Vietnam

<sup>2</sup>Faculty of Natural Sciences, Quy Nhon University, 170 An Duong Vuong Street, Quy Nhon City 590000, Vietnam

### SUPPORTING INFORMATION

Table S1. Interaction energy corrected both BSSE and ZPE of **2H-Z** dimers in two geometries including the hexagonal and perpendicular structures with Z= O, S, Se and Te

|                                         | 2H-O  | 2H-S | 2H-Se | 2H-Te |
|-----------------------------------------|-------|------|-------|-------|
| $\Delta E^{*a}$ (kJ.mol <sup>-1</sup> ) | -10.3 | -7.3 | -7.9  | -6.2  |
| $\Delta E^{*b}$ (kJ.mol <sup>-1</sup> ) | -9.5  | -2.9 | -2.8  | 2.5   |

<sup>a</sup>) interaction energy of hexagonal structure  
<sup>b</sup>) interaction energy of perpendicular structure

Table S2. The electron density [ $\rho(r)$ ] and Laplacian electron density [ $\nabla^2(\rho)$ ] at BCPs of C<sub>sp2</sub>-H $\cdots$ H-C<sub>sp2</sub> dihydrogen bond

|                       | 2CH <sub>3</sub> -Se | 2CH <sub>3</sub> -Te | 2NH <sub>2</sub> -Se | 2NH <sub>2</sub> -Te |
|-----------------------|----------------------|----------------------|----------------------|----------------------|
| $\rho(r)$ (au)        | 0.006                | 0.008                | 0.008                | 0.009                |
| $\nabla^2(\rho)$ (au) | 0.02                 | 0.03                 | 0.03                 | 0.04                 |

Table S3. The H $\cdots$ Z interaction distance ( $r_{H\cdots Z}$  (Å)), the ratio between the intermolecular distance and the sum of van der Waals radii of the H and Z atoms ( $r_{H\cdots Z}/\sum r_{vdW}$ ), the typical topological parameters at BCPs of **2R-Z** dimers, and individual energy of nonconventional hydrogen bond ( $E_{HB}$ ), with R= H, F, Cl, Br, CH<sub>3</sub>, NH<sub>2</sub>; and Z = O, S, Se, Te

|                                  | 2H-O  | 2H-S  | 2H-Se | 2H-Te |
|----------------------------------|-------|-------|-------|-------|
| $r_{H\cdots Z}$ (Å)              | 2.50  | 2.82  | 2.96  | 3.12  |
| $r_{H\cdots Z}/\sum r_{vdW}$     | 0.92  | 0.94  | 0.95  | 0.96  |
| $\rho(r)$ (au)                   | 0.009 | 0.009 | 0.008 | 0.008 |
| $\nabla^2(\rho)$ (au)            | 0.03  | 0.03  | 0.02  | 0.02  |
| $E_{HB}$ (kJ.mol <sup>-1</sup> ) | -8.1  | -6.3  | -5.2  | -4.8  |
|                                  | 2F-O  | 2F-S  | 2F-Se | 2F-Te |
| $r_{H\cdots Z}$ (Å)              | 2.48  | 2.86  | 2.98  | 3.15  |
| $r_{H\cdots Z}/\sum r_{vdW}$     | 0.91  | 0.95  | 0.96  | 0.97  |
| $\rho(r)$ (au)                   | 0.010 | 0.009 | 0.008 | 0.008 |

|                                                  |                          |                          |                           |                           |
|--------------------------------------------------|--------------------------|--------------------------|---------------------------|---------------------------|
| $\nabla^2(\rho)$ (au)                            | 0.04                     | 0.02                     | 0.02                      | 0.02                      |
| $E_{\text{HB}}$ (kJ.mol <sup>-1</sup> )          | -8.4                     | -5.6                     | -4.8                      | -4.7                      |
|                                                  | <b>2Cl-O</b>             | <b>2Cl-S</b>             | <b>2Cl-Se</b>             | <b>2Cl-Te</b>             |
| $r_{\text{H}\cdots\text{Z}}$ (Å)                 | 2.47                     | 2.76                     | 2.86                      | 3.02                      |
| $r_{\text{H}\cdots\text{Z}}/\sum r_{\text{vdW}}$ | 0.91                     | 0.92                     | 0.92                      | 0.93                      |
| $\rho(r)$ (au)                                   | 0.010                    | 0.010                    | 0.010                     | 0.010                     |
| $\nabla^2(\rho)$ (au)                            | 0.04                     | 0.03                     | 0.03                      | 0.02                      |
| $E_{\text{HB}}$ (kJ.mol <sup>-1</sup> )          | -8.6                     | -7.2                     | -6.4                      | -6.5                      |
|                                                  | <b>2Br-O</b>             | <b>2Br-S</b>             | <b>2Br-Se</b>             | <b>2Br-Te</b>             |
| $r_{\text{H}\cdots\text{Z}}$ (Å)                 | 2.48                     | 2.75                     | 2.85                      | 2.99                      |
| $r_{\text{H}\cdots\text{Z}}/\sum r_{\text{vdW}}$ | 0.91                     | 0.92                     | 0.92                      | 0.92                      |
| $\rho(r)$ (au)                                   | 0.010                    | 0.011                    | 0.010                     | 0.011                     |
| $\nabla^2(\rho)$ (au)                            | 0.03                     | 0.03                     | 0.03                      | 0.02                      |
| $E_{\text{HB}}$ (kJ.mol <sup>-1</sup> )          | -8.5                     | -7.4                     | -6.7                      | -6.7                      |
|                                                  | <b>2CH<sub>3</sub>-O</b> | <b>2CH<sub>3</sub>-S</b> | <b>2CH<sub>3</sub>-Se</b> | <b>2CH<sub>3</sub>-Te</b> |
| $r_{\text{H}\cdots\text{Z}}$ (Å)                 | 2.46                     | 2.78                     | 2.91                      | 3.06                      |
| $r_{\text{H}\cdots\text{Z}}/\sum r_{\text{vdW}}$ | 0.90                     | 0.93                     | 0.94                      | 0.94                      |
| $\rho(r)$ (au)                                   | 0.010                    | 0.010                    | 0.009                     | 0.009                     |
| $\nabla^2(\rho)$ (au)                            | 0.03                     | 0.03                     | 0.02                      | 0.02                      |
| $E_{\text{HB}}$ (kJ.mol <sup>-1</sup> )          | -8.7                     | -7.0                     | -5.9                      | -5.6                      |
|                                                  | <b>2NH<sub>2</sub>-O</b> | <b>2NH<sub>2</sub>-S</b> | <b>2NH<sub>2</sub>-Se</b> | <b>2NH<sub>2</sub>-Te</b> |
| $r_{\text{H}\cdots\text{Z}}$ (Å)                 | 2.36                     | 2.67                     | 2.76                      | 2.91                      |
| $r_{\text{H}\cdots\text{Z}}/\sum r_{\text{vdW}}$ | 0.87                     | 0.89                     | 0.89                      | 0.89                      |
| $\rho(r)$ (au)                                   | 0.012                    | 0.012                    | 0.012                     | 0.012                     |
| $\nabla^2(\rho)$ (au)                            | 0.04                     | 0.03                     | 0.03                      | 0.03                      |
| $E_{\text{HB}}$ (kJ.mol <sup>-1</sup> )          | -11.0                    | -9.3                     | -8.3                      | -8.0                      |

Table S4. The minimum electrostatic potential ( $V_{\text{S,min}}$ ) (kJ.mol<sup>-1</sup>) in RCHZ monomer with R= H, F, Cl, Br, CH<sub>3</sub>, NH<sub>2</sub> and Z= O, S, Se, Te

|                    |                          |                          |                           |                           |                          |                          |                           |                           |
|--------------------|--------------------------|--------------------------|---------------------------|---------------------------|--------------------------|--------------------------|---------------------------|---------------------------|
|                    | <b>HCHO</b>              | <b>HCHS</b>              | <b>HCHSe</b>              | <b>HCHTe</b>              | <b>FCHO</b>              | <b>FCHS</b>              | <b>FCHSe</b>              | <b>FCHTe</b>              |
| $V_{\text{S,min}}$ | -147.0                   | -88.7                    | -85.0                     | -80.4                     | -118.4                   | -74.3                    | -74.1                     | -71.4                     |
|                    | <b>ClCHO</b>             | <b>ClCHS</b>             | <b>ClCHSe</b>             | <b>ClCHTe</b>             | <b>BrCHO</b>             | <b>BrCHS</b>             | <b>BrCHSe</b>             | <b>BrCHTe</b>             |
| $V_{\text{S,min}}$ | -114.5                   | -74.5                    | -74.7                     | -72.8                     | -108.3                   | -72.1                    | -71.1                     | -70.9                     |
|                    | <b>CH<sub>3</sub>CHO</b> | <b>CH<sub>3</sub>CHS</b> | <b>CH<sub>3</sub>CHSe</b> | <b>CH<sub>3</sub>CHTe</b> | <b>NH<sub>2</sub>CHO</b> | <b>NH<sub>2</sub>CHS</b> | <b>NH<sub>2</sub>CHSe</b> | <b>NH<sub>2</sub>CHTe</b> |
| $V_{\text{S,min}}$ | -164.8                   | -104.5                   | -101.1                    | -95.6                     | -193.1                   | -131.0                   | -128.1                    | -120.9                    |

Table S5. The charge of Z and H ( $C_{\text{sp}^2}$ -H) atoms in **2R-Z** dimers with R= H, F, Cl, Br, CH<sub>3</sub>, NH<sub>2</sub> and Z= O, S, Se, Te

|      |              |              |               |               |
|------|--------------|--------------|---------------|---------------|
|      | <b>2H-O</b>  | <b>2H-S</b>  | <b>2H-Se</b>  | <b>2H-Te</b>  |
| q(Z) | -0.62        | -0.00        | 0.06          | 0.20          |
| q(H) | 0.12         | 0.18         | 0.19          | 0.18          |
|      | <b>2F-O</b>  | <b>2F-S</b>  | <b>2F-Se</b>  | <b>2F-Te</b>  |
| q(Z) | -0.65        | -0.05        | -0.00         | 0.11          |
| q(H) | 0.13         | 0.17         | 0.17          | 0.16          |
|      | <b>2Cl-O</b> | <b>2Cl-S</b> | <b>2Cl-Se</b> | <b>2Cl-Te</b> |
| q(Z) | -0.61        | 0.03         | 0.10          | 0.22          |
| q(H) | 0.16         | 0.20         | 0.20          | 0.19          |
|      | <b>2Br-O</b> | <b>2Br-S</b> | <b>2Br-Se</b> | <b>2Br-Te</b> |

|      |                          |                          |                           |                           |
|------|--------------------------|--------------------------|---------------------------|---------------------------|
| q(Z) | -0.61                    | 0.06                     | 0.13                      | 0.26                      |
| q(H) | 0.16                     | 0.20                     | 0.20                      | 0.19                      |
|      | <b>2CH<sub>3</sub>-O</b> | <b>2CH<sub>3</sub>-S</b> | <b>2CH<sub>3</sub>-Se</b> | <b>2CH<sub>3</sub>-Te</b> |
| q(Z) | -0.65                    | -0.06                    | -0.00                     | 0.12                      |
| q(H) | 0.12                     | 0.18                     | 0.18                      | 0.17                      |
|      | <b>2NH<sub>2</sub>-O</b> | <b>2NH<sub>2</sub>-S</b> | <b>2NH<sub>2</sub>-Se</b> | <b>2NH<sub>2</sub>-Te</b> |
| q(Z) | -0.75                    | -0.27                    | -0.24                     | -0.17                     |
| q(H) | 0.13                     | 0.19                     | 0.19                      | 0.18                      |



Table S6. The percentage contribution (%) of energy components to total interaction energy of **2R-Z** dimers using SAPT2+ approach at def2-TZVPD, with R= H, F, Cl, Br, CH<sub>3</sub>, NH<sub>2</sub> and Z= O, S, Se, Te

|                                         | <b>2H-O</b>              | <b>2H-S</b>              | <b>2H-Se</b>              | <b>2H-Te</b>              |
|-----------------------------------------|--------------------------|--------------------------|---------------------------|---------------------------|
| %eles                                   | 53.2                     | 40.6                     | 35.5                      | 45.6                      |
| %disp                                   | 26.4                     | 31.8                     | 32.4                      | 0.2                       |
| %ind                                    | 16.3                     | 20.6                     | 22.4                      | 54.2                      |
| % $\delta E_{\text{int},r}^{\text{HF}}$ | 4.1                      | 7.0                      | 9.7                       | 0.0                       |
|                                         | <b>2F-O</b>              | <b>2F-S</b>              | <b>2F-Se</b>              | <b>2F-Te</b>              |
| %eles                                   | 54.5                     | 40.0                     | 33.7                      | 44.1                      |
| %disp                                   | 24.0                     | 29.3                     | 29.2                      | 0.2                       |
| %ind                                    | 17.9                     | 23.6                     | 26.1                      | 51.9                      |
| % $\delta E_{\text{int},r}^{\text{HF}}$ | 3.6                      | 7.0                      | 11.1                      | 3.8                       |
|                                         | <b>2Cl-O</b>             | <b>2Cl-S</b>             | <b>2Cl-Se</b>             | <b>2Cl-Te</b>             |
| %eles                                   | 50.6                     | 37.9                     | 32.0                      | 45.7                      |
| %disp                                   | 27.0                     | 30.5                     | 30.3                      | 0.3                       |
| %ind                                    | 18.2                     | 23.9                     | 26.6                      | 53.9                      |
| % $\delta E_{\text{int},r}^{\text{HF}}$ | 4.2                      | 7.7                      | 11.0                      | 0.1                       |
|                                         | <b>2Br-O</b>             | <b>2Br-S</b>             | <b>2Br-Se</b>             | <b>2Br-Te</b>             |
| %eles                                   | 52.5                     | 39.8                     | 34.9                      | 46.0                      |
| %disp                                   | 28.3                     | 31.2                     | 31.0                      | 0.6                       |
| %ind                                    | 18.2                     | 23.9                     | 26.6                      | 53.2                      |
| % $\delta E_{\text{int},r}^{\text{HF}}$ | 0.9                      | 5.1                      | 7.5                       | 0.1                       |
|                                         | <b>2CH<sub>3</sub>-O</b> | <b>2CH<sub>3</sub>-S</b> | <b>2CH<sub>3</sub>-Se</b> | <b>2CH<sub>3</sub>-Te</b> |
| %eles                                   | 50.2                     | 39.4                     | 34.4                      | 46.7                      |
| %disp                                   | 28.0                     | 32.2                     | 32.7                      | 1.0                       |
| %ind                                    | 17.4                     | 21.4                     | 23.9                      | 51.7                      |
| % $\delta E_{\text{int},r}^{\text{HF}}$ | 4.4                      | 7.0                      | 8.9                       | 0.6                       |
|                                         | <b>2NH<sub>2</sub>-O</b> | <b>2NH<sub>2</sub>-S</b> | <b>2NH<sub>2</sub>-Se</b> | <b>2NH<sub>2</sub>-Te</b> |
| %eles                                   | 52.6                     | 43.1                     | 40.7                      | 46.2                      |
| %disp                                   | 24.1                     | 25.8                     | 25.1                      | 0.6                       |
| %ind                                    | 18.5                     | 23.5                     | 26.6                      | 52.9                      |
| % $\delta E_{\text{int},r}^{\text{HF}}$ | 4.8                      | 7.6                      | 7.6                       | 0.2                       |

Table S7. The percentage contribution (%) of energy components to the total interaction energy of **2R-Te** dimers with R= H, F, Cl, Br, CH<sub>3</sub> and NH<sub>2</sub>

|                                                       | <b>2H-Te</b> | <b>2F-Te</b> | <b>2Br-Te</b> | <b>2Cl-Te</b> | <b>2CH<sub>3</sub>-Te</b> | <b>2NH<sub>2</sub>-Te</b> |
|-------------------------------------------------------|--------------|--------------|---------------|---------------|---------------------------|---------------------------|
| %eles <sup>a)</sup>                                   | 45.7         | 43.6         | 38.4          | 45.8          | 46.9                      | 46.0                      |
| %disp <sup>a)</sup>                                   | 0.2          | 0.3          | 1.7           | 0.5           | 1.5                       | 0.8                       |
| %ind <sup>a)</sup>                                    | 54.1         | 51.2         | 46.6          | 53.7          | 51.5                      | 53.0                      |
| % $\delta E_{\text{int},r}^{\text{HF}}$ <sup>a)</sup> | -            | 4.9          | 13.3          | 0.1           | 0.1                       | 0.1                       |
|                                                       | <b>2H-Te</b> | <b>2F-Te</b> | <b>2Br-Te</b> | <b>2Cl-Te</b> | <b>2CH<sub>3</sub>-Te</b> | <b>2NH<sub>2</sub>-Te</b> |
| %eles <sup>b)</sup>                                   | 45.6         | 24.3         | 46.6          | 48.2          | 47.7                      | 46.9                      |
| %disp <sup>b)</sup>                                   | 0.2          | 4.1          | 0.7           | 0.5           | 0.8                       | 0.6                       |
| %ind <sup>b)</sup>                                    | 54.2         | 32.7         | 52.5          | 51.4          | 51.5                      | 52.4                      |
| % $\delta E_{\text{int},r}^{\text{HF}}$ <sup>b)</sup> | 0.0          | 39.0         | 0.0           | 0.3           | -                         | 0.2                       |
|                                                       | <b>2H-Te</b> | <b>2F-Te</b> | <b>2Br-Te</b> | <b>2Cl-Te</b> | <b>2CH<sub>3</sub>-Te</b> | <b>2NH<sub>2</sub>-Te</b> |
| %eles <sup>c)</sup>                                   | 38.6         | 35.8         | 29.0          | 33.0          | 28.5                      | 12.0                      |
| %disp <sup>c)</sup>                                   | 15.1         | 10.8         | 14.5          | 13.4          | 17.1                      | 20.4                      |
| %ind <sup>c)</sup>                                    | 44.2         | 51.2         | 54.4          | 51.4          | 52.6                      | 53.2                      |
| % $\delta E_{\text{int},r}^{\text{HF}}$ <sup>c)</sup> | 2.1          | 2.2          | 2.2           | 2.2           | 1.8                       | 14.4                      |

<sup>a)</sup> using SAPT2+ approach with def2-TZVPPD

<sup>b)</sup> using SAPT2+ approach with def2-TZVPPD for Te atom and aug-cc-pVTZ for remaining atoms

<sup>c)</sup> using SAPT2 approach with basis set def2-QZVPPD

Table S8. The  $\text{sign}(\lambda_2)\rho(r)$  and reduced density gradient (RDG) values of  $\text{C}_{\text{sp}^2}\text{-H}\cdots\text{Z}$  interaction spikes in **2R-Z** dimers with R= H, F, Cl, Br,  $\text{CH}_3$ ,  $\text{NH}_2$  and Z= O, S, Se, Te

|                                      | <b>2H-O</b>  | <b>2F-O</b>  | <b>2Cl-O</b>  | <b>2Br-O</b>  | <b>2CH<sub>3</sub>-O</b>  | <b>2NH<sub>2</sub>-O</b>  |
|--------------------------------------|--------------|--------------|---------------|---------------|---------------------------|---------------------------|
| $\text{sign}(\lambda_2)\rho(r)$ (au) | -0.0095      | -0.01        | -0.0105       | -0.0102       | -0.01                     | -0.0119                   |
| RDG (au)                             | 0.105        | 0.124        | 0.136         | 0.109         | 0.148                     | 0.106                     |
|                                      | <b>2H-S</b>  | <b>2F-S</b>  | <b>2Cl-S</b>  | <b>2Br-S</b>  | <b>2CH<sub>3</sub>-S</b>  | <b>2NH<sub>2</sub>-S</b>  |
| $\text{sign}(\lambda_2)\rho(r)$ (au) | -0.0089      | -0.0085      | -0.0101       | -0.0101       | -0.0096                   | -0.0112                   |
| RDG (au)                             | 0.13         | 0.129        | 0.139         | 0.179         | 0.102                     | 0.112                     |
|                                      | <b>2H-Se</b> | <b>2F-Se</b> | <b>2Cl-Se</b> | <b>2Br-Se</b> | <b>2CH<sub>3</sub>-Se</b> | <b>2NH<sub>2</sub>-Se</b> |
| $\text{sign}(\lambda_2)\rho(r)$ (au) | -0.0081      | -0.0081      | -0.001        | -0.0101       | -0.0082                   | -0.011                    |
| RDG (au)                             | 0.119        | 0.152        | 0.086         | 0.116         | 0.105                     | 0.122                     |
|                                      | <b>2H-Te</b> | <b>2F-Te</b> | <b>2Cl-Te</b> | <b>2Br-Te</b> | <b>2CH<sub>3</sub>-Te</b> | <b>2NH<sub>2</sub>-Te</b> |
| $\text{sign}(\lambda_2)\rho(r)$ (au) | -0.0075      | -0.0076      | -0.0095       | -0.0099       | -0.0084                   | -0.0113                   |
| RDG (au)                             | 0.119        | 0.093        | 0.108         | 0.125         | 0.107                     | 0.108                     |

Table S9. Changes in  $\text{C}_{\text{sp}^2}\text{-H}$  bond lengths ( $\Delta r(\text{C}_{\text{sp}^2}\text{-H})$ , mÅ) and their corresponding stretching frequencies ( $\Delta\nu(\text{C}_{\text{sp}^2}\text{-H})$ ,  $\text{cm}^{-1}$ ) in the **2R-Z** dimers with R= H, F, Cl, Br,  $\text{CH}_3$ ,  $\text{NH}_2$  and Z= O, S, Se, Te

|                                              | <b>2H-O</b>              | <b>2H-S</b>              | <b>2H-Se</b>              | <b>2H-Te</b>              |
|----------------------------------------------|--------------------------|--------------------------|---------------------------|---------------------------|
| $\Delta\nu(\text{C}_{\text{sp}^2}\text{-H})$ | 47.0                     | -6.0                     | -16.4                     | -22.5                     |
| $\Delta r(\text{C}_{\text{sp}^2}\text{-H})$  | -3.0                     | 0.7                      | 1.4                       | 1.7                       |
|                                              | <b>2F-O</b>              | <b>2F-S</b>              | <b>2F-Se</b>              | <b>2F-Te</b>              |
| $\Delta\nu(\text{C}_{\text{sp}^2}\text{-H})$ | 25.5                     | -0.3                     | -8.4                      | -12.2                     |
| $\Delta r(\text{C}_{\text{sp}^2}\text{-H})$  | -1.5                     | 0.3                      | 0.8                       | 0.8                       |
|                                              | <b>2Cl-O</b>             | <b>2Cl-S</b>             | <b>2Cl-Se</b>             | <b>2Cl-Te</b>             |
| $\Delta\nu(\text{C}_{\text{sp}^2}\text{-H})$ | 23.3                     | -13.8                    | -24.9                     | -33.4                     |
| $\Delta r(\text{C}_{\text{sp}^2}\text{-H})$  | -1.1                     | 1.4                      | 1.9                       | 2.1                       |
|                                              | <b>2Br-O</b>             | <b>2Br-S</b>             | <b>2Br-Se</b>             | <b>2Br-Te</b>             |
| $\Delta\nu(\text{C}_{\text{sp}^2}\text{-H})$ | 21.3                     | -17.8                    | -29.5                     | -38.6                     |
| $\Delta r(\text{C}_{\text{sp}^2}\text{-H})$  | -0.9                     | 1.7                      | 2.2                       | 2.4                       |
|                                              | <b>2CH<sub>3</sub>-O</b> | <b>2CH<sub>3</sub>-S</b> | <b>2CH<sub>3</sub>-Se</b> | <b>2CH<sub>3</sub>-Te</b> |
| $\Delta\nu(\text{C}_{\text{sp}^2}\text{-H})$ | 52.6                     | -2.3                     | -11.3                     | -10.6                     |
| $\Delta r(\text{C}_{\text{sp}^2}\text{-H})$  | -3.5                     | 0.4                      | 0.9                       | 0.6                       |
|                                              | <b>2NH<sub>2</sub>-O</b> | <b>2NH<sub>2</sub>-S</b> | <b>2NH<sub>2</sub>-Se</b> | <b>2NH<sub>2</sub>-Te</b> |
| $\Delta\nu(\text{C}_{\text{sp}^2}\text{-H})$ | 43.1                     | -17.7                    | -31.5                     | -34.6                     |
| $\Delta r(\text{C}_{\text{sp}^2}\text{-H})$  | -2.5                     | 1.3                      | 2.0                       | 1.9                       |

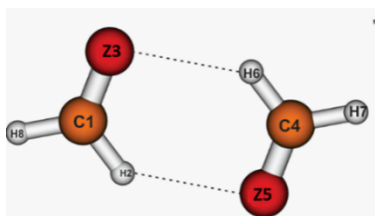

**2H-Z (I)**

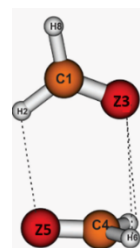

**2H-Z (II)**

Figure S1. Stable structures and interaction energies (given in parentheses, in  $\text{kJ}\cdot\text{mol}^{-1}$ ) of **2H-Z** dimer with Z= O, S, Se, Te

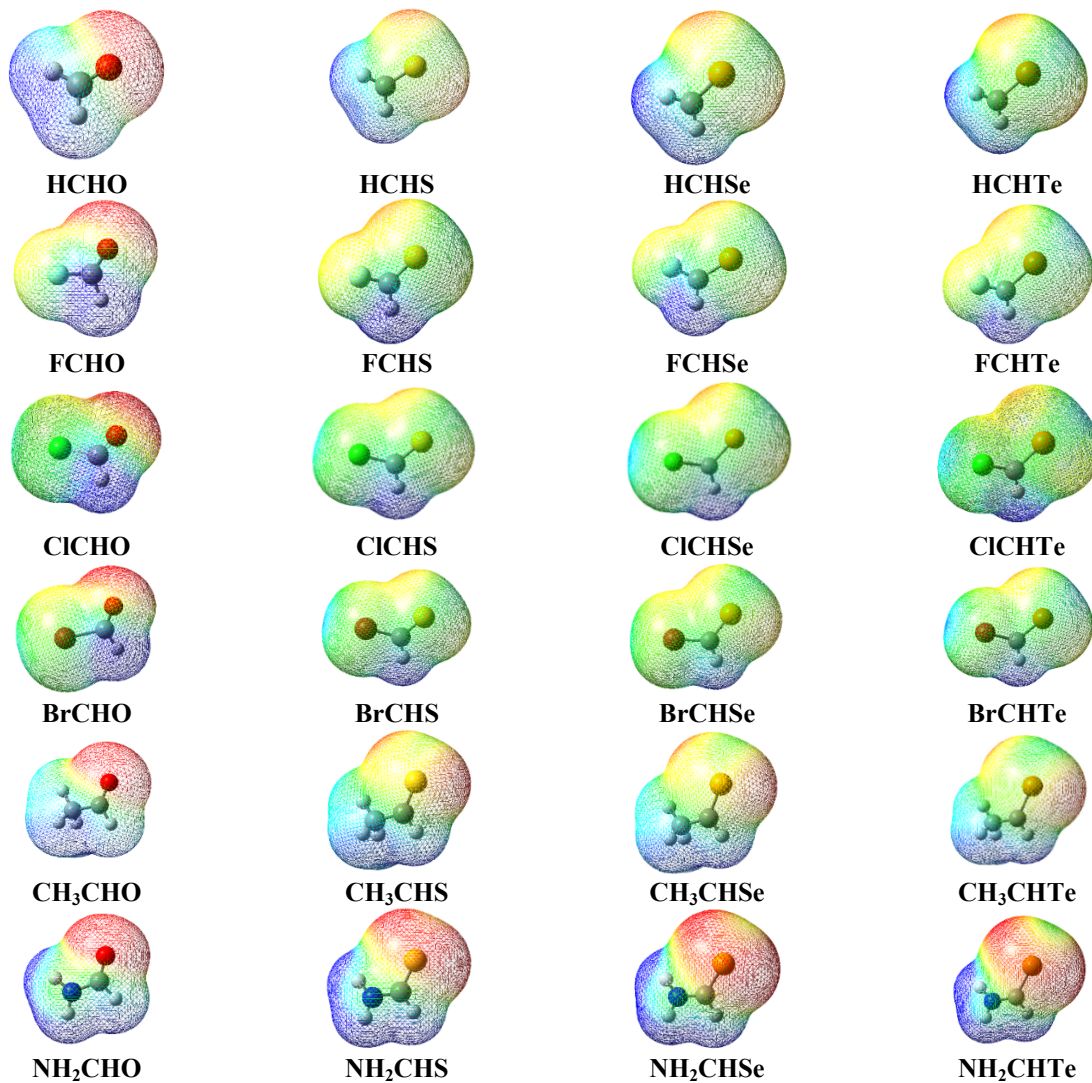

Figure S2. Molecular Electrostatic Potential (MEP) surface of monomers

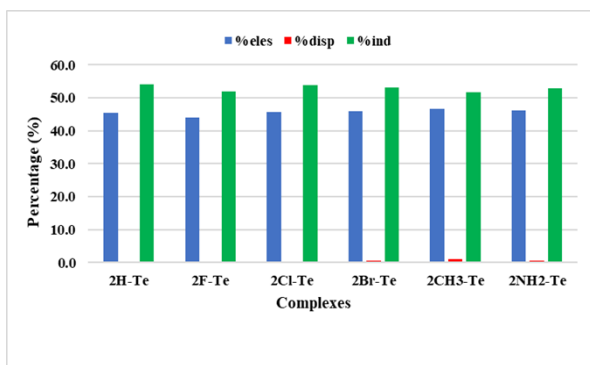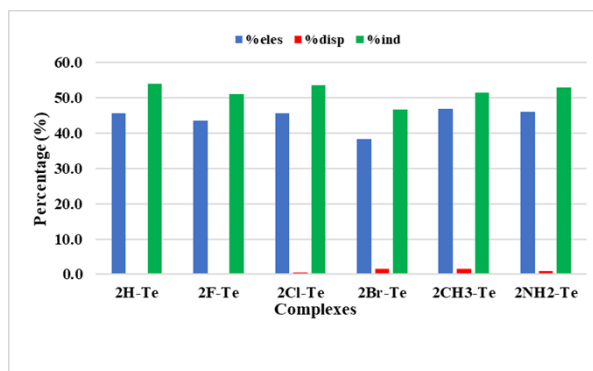

(i)

(ii)

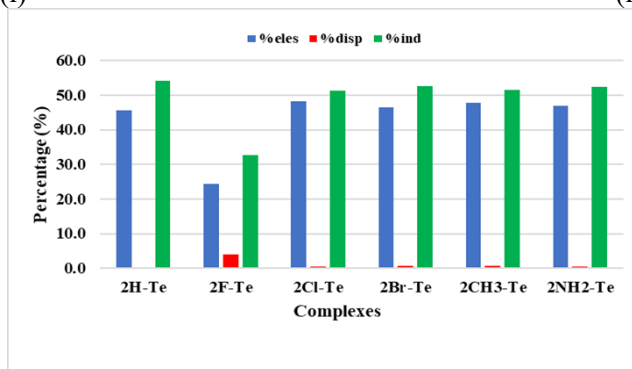

(iii)

Figure S3a. The percentage contribution (%) of energy components to the stability of **2R-Te** dimers using SAPT2+ approach at different level of theories: i) using def2-TZVPD; ii) using def2-TZVPPD; iii) using def2-TZVPPD for Te atom and aug-cc-pVTZ for remaining ones

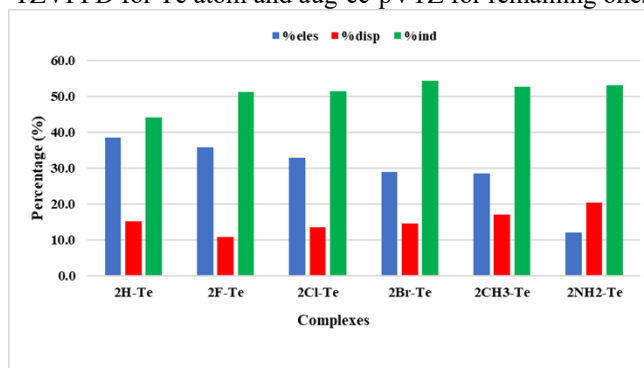

Figure S3b. The percentage contribution (%) of energy components to the stability of **2R-Te** dimers using SAPT2 approach with def2-QZVPPD



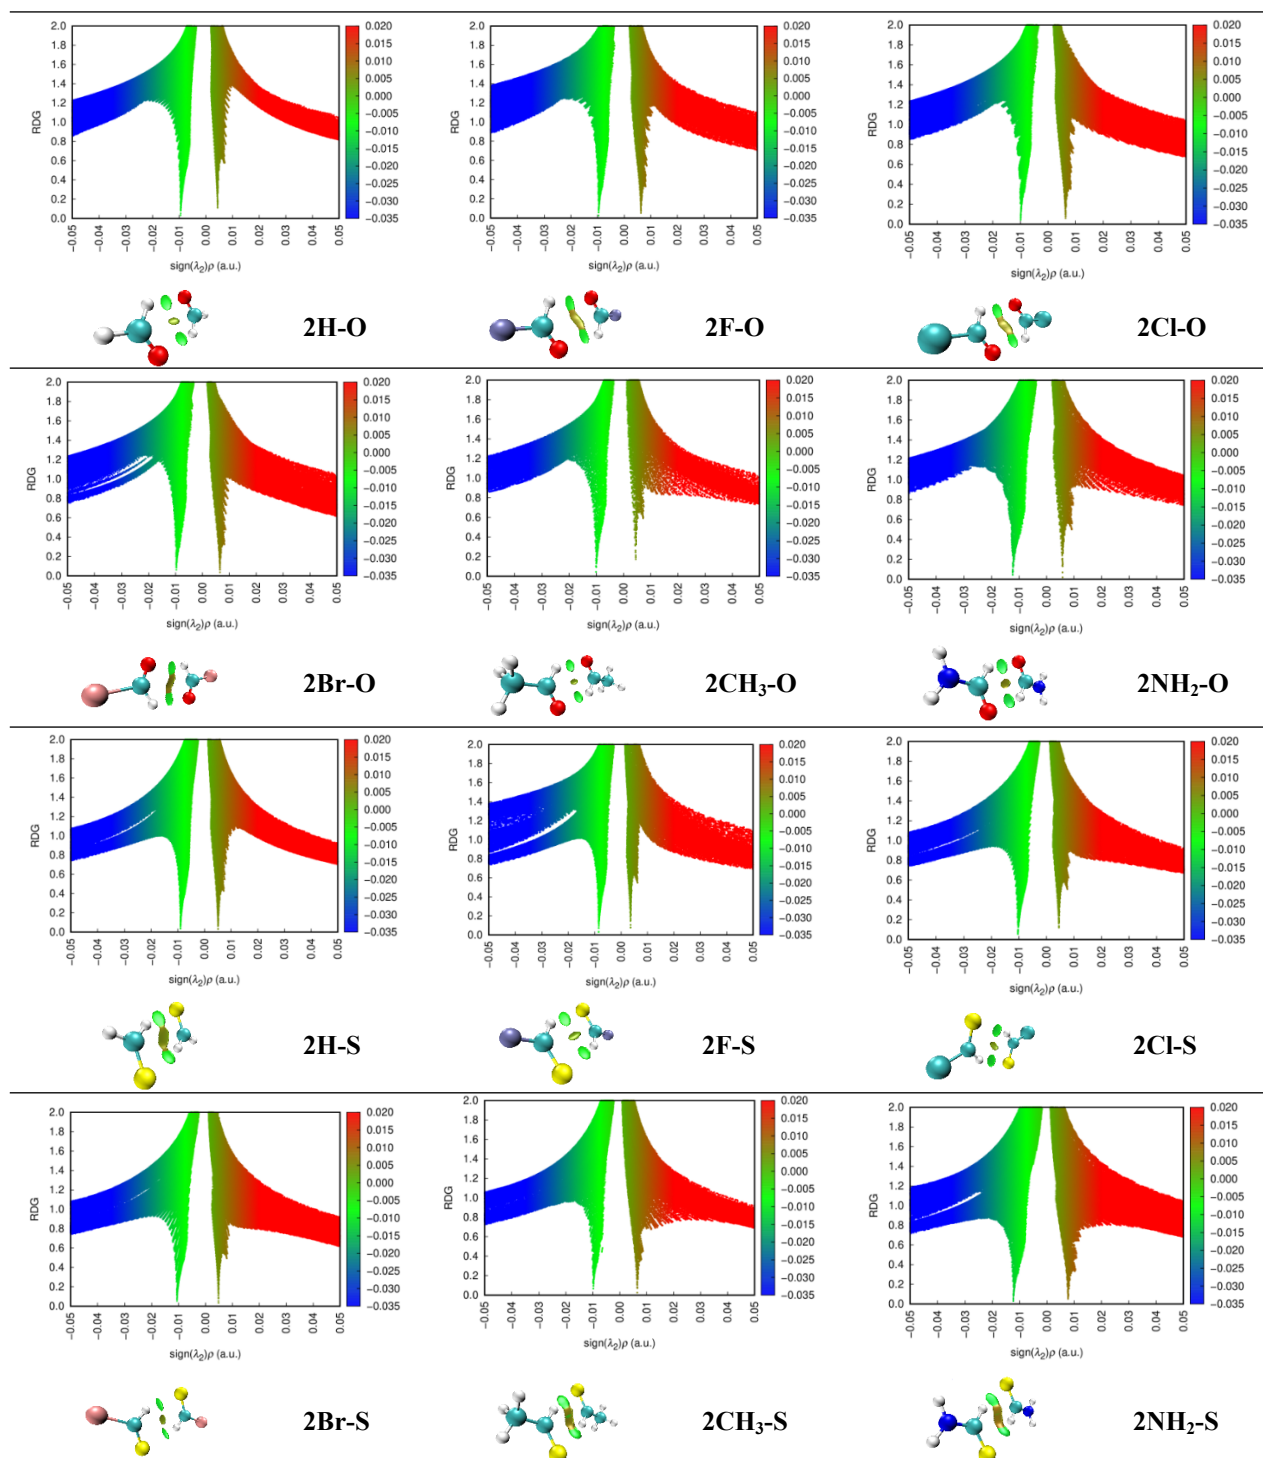

Figure S4a. Plots of the reduced density gradient (s, au) versus the electron density multiplied by the sign of the second Hessian eigenvalue ( $\text{sign}(\lambda_2)\rho$ , au) for the 2R-Z dimers (R= H, F, Cl, Br, CH<sub>3</sub>, NH<sub>2</sub>; Z= O, S)

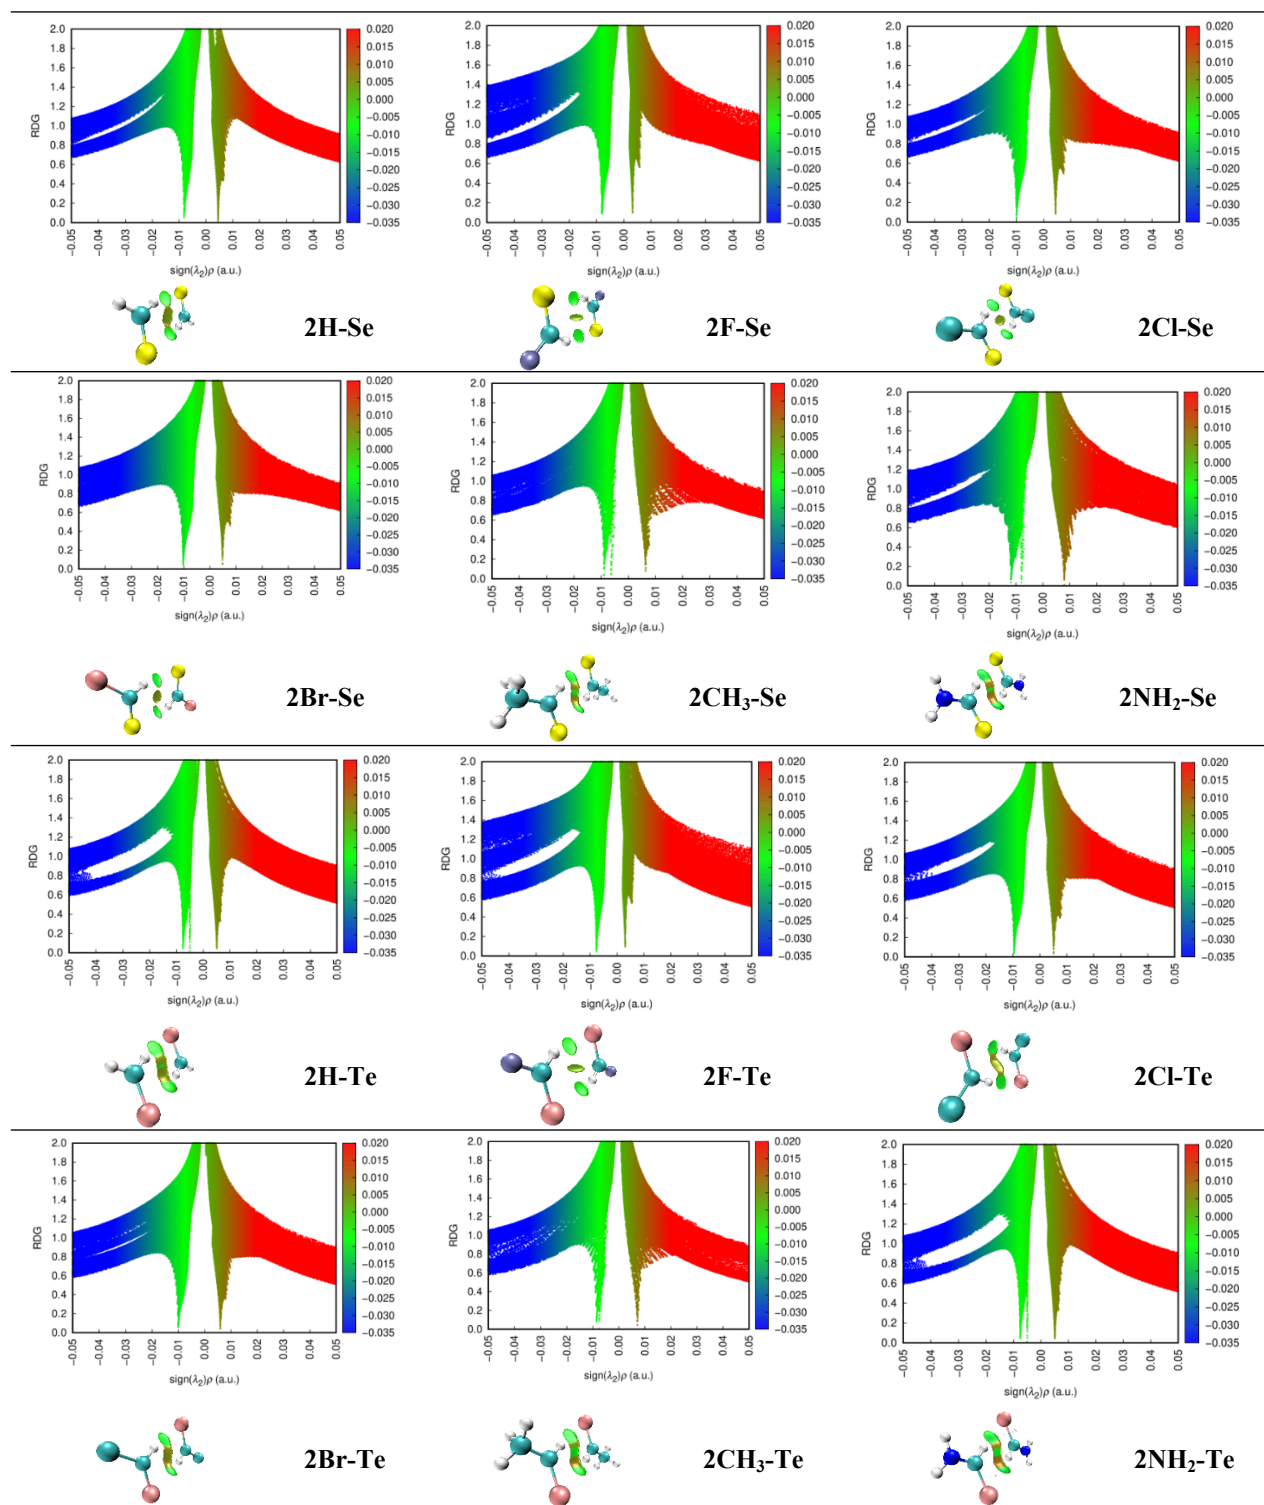

Figure S4b. Plots of the reduced density gradient (s, au) versus the electron density multiplied by the sign of the second Hessian eigenvalue ( $\text{sign}(\lambda_2)\rho$ , au) for the 2R-Z dimers (R= H, F, Cl, Br, CH<sub>3</sub>, NH<sub>2</sub>; Z= Se, Te)

Table S10. XYZ coordinate of **2R-Z** dimers and **RCHZ** monomers with R= H, F, Cl, Br, CH<sub>3</sub>, NH<sub>2</sub>; Z= O, S, Se, Te optimized at MP2/aug-cc-pVTZ-PP for Te atom and MP2/6-311++G(3df,2pd) for remaining atoms

| Dimer                            | Coordinate |             |             |             |
|----------------------------------|------------|-------------|-------------|-------------|
| <b>2H-O<br/>(hexagonal)</b>      | C          | 1.64728800  | 0.73447600  | 0.00000000  |
|                                  | O          | 1.64728800  | -0.47790500 | 0.00000000  |
|                                  | H          | 0.70964100  | 1.30454500  | 0.00000000  |
|                                  | H          | 2.58978500  | 1.30271100  | 0.00000000  |
|                                  | C          | -1.64728800 | -0.73447600 | 0.00000000  |
|                                  | O          | -1.64728800 | 0.47790500  | 0.00000000  |
|                                  | H          | -0.70964100 | -1.30454500 | 0.00000000  |
|                                  | H          | -2.58978500 | -1.30271100 | 0.00000000  |
| <b>2H-O<br/>(perpendicular)</b>  | C          | -1.10336100 | -1.00408500 | 0.00000000  |
|                                  | O          | -0.08754400 | -1.66491600 | 0.00000000  |
|                                  | H          | -1.59277700 | -0.69499300 | 0.93348200  |
|                                  | H          | -1.59277700 | -0.69499300 | -0.93348200 |
|                                  | C          | 1.17517300  | 1.16529400  | 0.00000000  |
|                                  | O          | 0.00000000  | 1.46108100  | 0.00000000  |
|                                  | H          | 1.95607200  | 1.93850800  | 0.00000000  |
|                                  | H          | 1.49895600  | 0.11490400  | 0.00000000  |
| <b>2H-S<br/>(hexagonal)</b>      | C          | -1.53942900 | -1.04383400 | -0.00000700 |
|                                  | H          | -0.45690400 | -1.14728900 | -0.00000400 |
|                                  | S          | -2.26208800 | 0.39576600  | 0.00000200  |
|                                  | C          | 1.53945100  | 1.04384600  | -0.00000100 |
|                                  | S          | 2.26207500  | -0.39577200 | 0.00000300  |
|                                  | H          | 0.45692900  | 1.14732500  | 0.00006600  |
|                                  | H          | 2.11642500  | 1.96484000  | -0.00007300 |
|                                  | H          | -2.11638000 | -1.96484300 | -0.00001600 |
| <b>2H-S<br/>(perpendicular)</b>  | C          | 0.90550900  | -1.33161300 | 0.00000000  |
|                                  | H          | 0.53071200  | -1.76640100 | 0.92158900  |
|                                  | H          | 0.53071200  | -1.76640100 | -0.92158900 |
|                                  | C          | -1.09068500 | 1.46259800  | 0.00000000  |
|                                  | H          | -1.60179200 | 2.42093200  | 0.00000000  |
|                                  | H          | 0.00000000  | 1.48687300  | 0.00000000  |
|                                  | S          | -1.89660400 | 0.07382000  | 0.00000000  |
|                                  | S          | 1.99981800  | -0.14637700 | 0.00000000  |
| <b>2H-Se<br/>(hexagonal)</b>     | C          | -0.82888000 | 1.71827000  | 0.00000000  |
|                                  | H          | -1.07139300 | 0.66002500  | 0.00000000  |
|                                  | Se         | 0.82888000  | 2.28528200  | 0.00000000  |
|                                  | C          | 0.82888000  | -1.71827100 | 0.00000000  |
|                                  | Se         | -0.82888000 | -2.28528200 | 0.00000000  |
|                                  | H          | 1.07139300  | -0.66002500 | 0.00000000  |
|                                  | H          | 1.65750600  | -2.41833200 | 0.00000000  |
|                                  | H          | -1.65750600 | 2.41833200  | 0.00000000  |
| <b>2H-Se<br/>(perpendicular)</b> | C          | 0.85731800  | -1.37536800 | 0.00000000  |
|                                  | H          | 0.47644300  | -1.79539100 | 0.92361400  |
|                                  | H          | 0.47644300  | -1.79539100 | -0.92361400 |
|                                  | C          | -1.08886500 | 1.55238100  | 0.00000000  |
|                                  | H          | -1.55949800 | 2.52910900  | 0.00000000  |
|                                  | H          | 0.00000000  | 1.51861700  | 0.00000000  |
|                                  | Se         | -2.03335700 | 0.08402100  | 0.00000000  |
|                                  | Se         | 2.09206000  | -0.12869800 | 0.00000000  |
| <b>2H-Te<br/>(hexagonal)</b>     | C          | 1.92479800  | 0.17619000  | 0.00000000  |
|                                  | H          | 1.00235500  | 0.74713900  | 0.00000000  |
|                                  | Te         | 1.92479800  | -1.76992600 | 0.00000000  |
|                                  | C          | -1.92479800 | -0.17619000 | 0.00000000  |
|                                  | Te         | -1.92479800 | 1.76992600  | 0.00000000  |
|                                  | H          | -1.00235500 | -0.74713900 | 0.00000000  |

|                                  |    |             |             |             |
|----------------------------------|----|-------------|-------------|-------------|
|                                  | H  | -2.85536500 | -0.73161200 | 0.00000000  |
|                                  | H  | 2.85536500  | 0.73161200  | 0.00000000  |
| <b>2H-Te<br/>(perpendicular)</b> | C  | 0.81431000  | -1.37859400 | 0.00000000  |
|                                  | H  | 0.47513500  | -1.83134400 | 0.92328900  |
|                                  | H  | 0.47513500  | -1.83134400 | -0.92328900 |
|                                  | C  | -1.09282500 | 1.57380300  | 0.00000000  |
|                                  | H  | -1.57477300 | 2.54392900  | 0.00000000  |
|                                  | H  | 0.00000000  | 1.54745800  | 0.00000000  |
|                                  | Te | -2.11010500 | -0.07205600 | 0.00000000  |
|                                  | Te | 2.15425100  | 0.04128700  | 0.00000000  |
| <b>2F-O</b>                      | C  | -1.06861000 | -1.37636700 | 0.00000000  |
|                                  | H  | 0.00000000  | -1.58697300 | 0.00000000  |
|                                  | O  | -1.59097100 | -0.31243500 | 0.00000000  |
|                                  | C  | 1.06859900  | 1.37642600  | 0.00000000  |
|                                  | O  | 1.59080400  | 0.31241500  | 0.00000000  |
|                                  | H  | 0.00001300  | 1.58716500  | 0.00000000  |
|                                  | F  | 1.76878800  | 2.51730600  | 0.00000000  |
|                                  | F  | -1.76863400 | -2.51735000 | 0.00000000  |
| <b>2F-S</b>                      | C  | 0.63618100  | 1.81632100  | 0.00000000  |
|                                  | H  | -0.38212500 | 1.43745500  | 0.00000000  |
|                                  | S  | 1.96897200  | 0.93896400  | 0.00000000  |
|                                  | C  | -0.63618100 | -1.81632100 | 0.00000000  |
|                                  | S  | -1.96897200 | -0.93896400 | 0.00000000  |
|                                  | H  | 0.38212500  | -1.43745500 | 0.00000000  |
|                                  | F  | -0.63618100 | -3.14786700 | 0.00000000  |
|                                  | F  | 0.63618100  | 3.14786700  | 0.00000000  |
| <b>2F-Se</b>                     | C  | 1.75100400  | 0.92889400  | 0.00000000  |
|                                  | H  | 0.73696200  | 1.31939100  | 0.00000000  |
|                                  | Se | 2.18673600  | -0.75666600 | 0.00000000  |
|                                  | C  | -1.75102500 | -0.92890400 | 0.00000000  |
|                                  | Se | -2.18671600 | 0.75666400  | 0.00000000  |
|                                  | H  | -0.73700000 | -1.31944400 | 0.00000000  |
|                                  | F  | -2.64163700 | -1.91488300 | 0.00000000  |
|                                  | F  | 2.64158100  | 1.91490200  | 0.00000000  |
| <b>2F-Te</b>                     | C  | 1.06832500  | 1.73658900  | 0.00000000  |
|                                  | H  | 0.00000000  | 1.53497100  | 0.00000000  |
|                                  | Te | 2.45701200  | 0.38130900  | 0.00000000  |
|                                  | C  | -1.06859400 | -1.73693000 | 0.00000000  |
|                                  | Te | -2.45685100 | -0.38121000 | 0.00000000  |
|                                  | H  | -0.00018900 | -1.53573500 | 0.00000000  |
|                                  | F  | -1.31419900 | -3.04530400 | 0.00000000  |
|                                  | F  | 1.31347200  | 3.04504300  | 0.00000000  |

|               |    |             |             |             |
|---------------|----|-------------|-------------|-------------|
| <b>2Cl-O</b>  | C  | -1.07428000 | -1.38652700 | 0.00000000  |
|               | H  | 0.00000000  | -1.58251500 | 0.00000000  |
|               | O  | -1.58262600 | -0.30939800 | 0.00000000  |
|               | C  | 1.07413600  | 1.38669400  | 0.00000000  |
|               | O  | 1.58217500  | 0.30941700  | 0.00000000  |
|               | H  | -0.00009700 | 1.58296400  | 0.00000000  |
|               | Cl | 1.99412600  | 2.87920800  | 0.00000000  |
|               | Cl | -1.99385800 | -2.87930200 | 0.00000000  |
| <b>2Cl-S</b>  | C  | -1.85885100 | 0.02354200  | 0.00000500  |
|               | H  | -1.09872700 | -0.75359100 | 0.00001300  |
|               | S  | -1.53146600 | 1.59373400  | 0.00000100  |
|               | C  | 1.85887600  | -0.02350100 | 0.00000600  |
|               | S  | 1.53136700  | -1.59366700 | 0.00000100  |
|               | H  | 1.09881300  | 0.75369100  | 0.00001500  |
|               | Cl | 3.43904700  | 0.65822200  | -0.00000400 |
|               | Cl | -3.43896800 | -0.65830600 | -0.00000300 |
| <b>2Cl-Se</b> | C  | 0.82040300  | 1.70433200  | 0.00000000  |
|               | H  | -0.18948500 | 1.30311600  | 0.00000000  |
|               | Se | 2.24548400  | 0.68815800  | 0.00000000  |
|               | C  | -0.82040300 | -1.70433200 | 0.00000000  |
|               | Se | -2.24548400 | -0.68815800 | 0.00000000  |
|               | H  | 0.18948500  | -1.30311600 | 0.00000000  |
|               | Cl | -0.82040300 | -3.41661200 | 0.00000000  |
|               | Cl | 0.82040300  | 3.41661200  | 0.00000000  |
| <b>2Cl-Te</b> | C  | -1.03663200 | -1.59744600 | 0.00000000  |
|               | H  | 0.00000000  | -1.27070000 | 0.00000000  |
|               | Te | -2.52140300 | -0.33438400 | 0.00000000  |
|               | C  | 1.03667300  | 1.59754800  | 0.00000000  |
|               | Te | 2.52131800  | 0.33433800  | 0.00000000  |
|               | H  | -0.00000600 | 1.27094900  | 0.00000000  |
|               | Cl | 1.16305800  | 3.30250700  | 0.00000000  |
|               | Cl | -1.16281100 | -3.30241800 | 0.00000000  |
| <b>2Br-O</b>  | C  | 1.15645300  | -1.32586900 | 0.00000000  |
|               | H  | 1.57485100  | -0.31621000 | 0.00000000  |
|               | O  | -0.00050400 | -1.60052500 | 0.00000000  |
|               | C  | -1.15712200 | 1.32529800  | 0.00000000  |
|               | O  | 0.00000000  | 1.59927100  | 0.00000000  |
|               | H  | -1.57614100 | 0.31589200  | 0.00000000  |
|               | Br | -2.55739400 | 2.65249200  | 0.00000000  |
|               | Br | 2.55766100  | -2.65209900 | 0.00000000  |
| <b>2Br-S</b>  | C  | -1.82634100 | 0.24979400  | -0.00004100 |
|               | H  | -1.16256900 | -0.61119600 | -0.00005900 |
|               | S  | -1.32677500 | 1.77183200  | -0.00009200 |
|               | C  | 1.82632800  | -0.24996200 | -0.00011900 |
|               | S  | 1.32702200  | -1.77208300 | -0.00008900 |
|               | H  | 1.16241200  | 0.61091700  | -0.00024200 |
|               | Br | 3.63063900  | 0.31207600  | 0.00006300  |
|               | Br | -3.63074500 | -0.31192400 | 0.00005500  |
| <b>2Br-Se</b> | C  | -1.87176100 | 0.05577300  | -0.00002700 |
|               | H  | -1.08671000 | -0.69587900 | -0.00006500 |
|               | Se | -1.54788400 | 1.77466800  | -0.00001800 |
|               | C  | 1.87177500  | -0.05575200 | -0.00007900 |
|               | Se | 1.54783900  | -1.77463600 | -0.00001600 |
|               | H  | 1.08675200  | 0.69592800  | -0.00018300 |
|               | Br | 3.57019100  | 0.74636600  | 0.00003200  |
|               | Br | -3.57015000 | -0.74640200 | 0.00002700  |
| <b>2Br-Te</b> | C  | 1.03683300  | 1.56007700  | 0.00000000  |

|                          |    |             |             |             |
|--------------------------|----|-------------|-------------|-------------|
|                          | H  | -0.00000200 | 1.23321800  | 0.00000000  |
|                          | Te | 2.52782500  | 0.30507300  | 0.00000000  |
|                          | C  | -1.03683300 | -1.56007400 | 0.00000000  |
|                          | Te | -2.52782900 | -0.30507500 | 0.00000000  |
|                          | H  | 0.00000000  | -1.23320800 | 0.00000000  |
|                          | Br | -1.14859300 | -3.42397600 | 0.00000000  |
|                          | Br | 1.14859800  | 3.42397900  | 0.00000000  |
| <b>2CH<sub>3</sub>-O</b> | C  | -1.78360500 | -0.00570900 | 0.00005000  |
|                          | H  | -1.06209700 | 0.82779600  | 0.00015300  |
|                          | O  | -1.38040600 | -1.15278600 | 0.00006000  |
|                          | C  | 1.78361100  | 0.00569800  | 0.00007000  |
|                          | O  | 1.38037900  | 1.15276400  | 0.00006100  |
|                          | H  | 1.06212500  | -0.82782600 | 0.00020900  |
|                          | C  | -3.23381900 | 0.36802500  | -0.00009700 |
|                          | H  | -3.86175100 | -0.51744400 | -0.00019900 |
|                          | H  | -3.44634600 | 0.98219100  | 0.87549500  |
|                          | H  | -3.44615200 | 0.98225400  | -0.87569200 |
|                          | C  | 3.23383500  | -0.36799700 | -0.00010500 |
|                          | H  | 3.44639800  | -0.98215000 | 0.87548700  |
|                          | H  | 3.44616500  | -0.98222800 | -0.87570000 |
|                          | H  | 3.86174300  | 0.51748900  | -0.00022900 |
| <b>2CH<sub>3</sub>-S</b> | C  | -1.81765900 | 0.30452600  | 0.00021500  |
|                          | H  | -0.84373500 | 0.79741300  | 0.00062300  |
|                          | S  | -1.89056300 | -1.31008400 | -0.00001100 |
|                          | C  | 1.81766700  | -0.30453100 | -0.00025200 |
|                          | S  | 1.89054700  | 1.31008000  | 0.00000400  |
|                          | H  | 0.84374900  | -0.79742900 | -0.00074300 |
|                          | C  | -2.99165100 | 1.22273400  | -0.00006500 |
|                          | H  | -3.92947700 | 0.67493800  | -0.00045400 |
|                          | H  | -2.94396600 | 1.87415700  | 0.87485800  |
|                          | H  | -2.94337000 | 1.87438000  | -0.87478800 |
|                          | C  | 2.99167000  | -1.22272300 | 0.00010900  |
|                          | H  | 2.94332700  | -1.87438400 | 0.87481900  |
|                          | H  | 2.94406500  | -1.87413400 | -0.87482700 |
|                          | H  | 3.92948900  | -0.67491600 | 0.00058300  |

|                           |                          |             |             |             |
|---------------------------|--------------------------|-------------|-------------|-------------|
| <b>2CH<sub>3</sub>-Se</b> | C                        | -0.93691000 | 1.62583100  | 0.00000000  |
|                           | H                        | 0.04587200  | 1.15517500  | 0.00000000  |
|                           | Se                       | -2.36471200 | 0.60104000  | 0.00000000  |
|                           | C                        | 0.93691000  | -1.62583100 | 0.00000000  |
|                           | Se                       | 2.36471200  | -0.60104000 | 0.00000000  |
|                           | H                        | -0.04587200 | -1.15517500 | 0.00000000  |
|                           | C                        | -0.93691000 | 3.11437500  | 0.00000000  |
|                           | H                        | -1.94411200 | 3.52161000  | 0.00000000  |
|                           | H                        | -0.39383600 | 3.47995900  | 0.87463800  |
|                           | H                        | -0.39383600 | 3.47995900  | -0.87463800 |
|                           | C                        | 0.93691000  | -3.11437500 | 0.00000000  |
|                           | H                        | 0.39383600  | -3.47995900 | 0.87463800  |
|                           | H                        | 0.39383600  | -3.47995900 | -0.87463800 |
| H                         | 1.94411200               | -3.52161000 | 0.00000000  |             |
| <b>2CH<sub>3</sub>-Te</b> | C                        | -1.01729700 | 1.58651900  | 0.00000000  |
|                           | H                        | -0.03422000 | 1.11843000  | 0.00000000  |
|                           | Te                       | -2.58784000 | 0.43106000  | 0.00000000  |
|                           | C                        | 1.01729700  | -1.58651900 | 0.00000000  |
|                           | Te                       | 2.58784000  | -0.43106000 | 0.00000000  |
|                           | H                        | 0.03422000  | -1.11843000 | 0.00000000  |
|                           | C                        | -1.01729700 | 3.07531600  | 0.00000000  |
|                           | H                        | -0.47490000 | 3.44436500  | 0.87456600  |
|                           | H                        | -0.47490000 | 3.44436500  | -0.87456600 |
|                           | H                        | -2.02204200 | 3.48974200  | 0.00000000  |
|                           | C                        | 1.01729700  | -3.07531600 | 0.00000000  |
|                           | H                        | 0.47490000  | -3.44436500 | 0.87456600  |
|                           | H                        | 0.47490000  | -3.44436500 | -0.87456600 |
| H                         | 2.02204200               | -3.48974200 | 0.00000000  |             |
| <b>2NH<sub>2</sub>-O</b>  | C                        | -1.69706300 | -0.00489000 | 0.00001300  |
|                           | H                        | -0.96887500 | 0.81679200  | 0.00004900  |
|                           | O                        | -1.36058100 | -1.17800900 | 0.00000100  |
|                           | C                        | 1.69706100  | 0.00489400  | -0.00000500 |
|                           | O                        | 1.36059100  | 1.17801700  | 0.00000100  |
|                           | H                        | 0.96886400  | -0.81678100 | -0.00002600 |
|                           | N                        | 2.98628400  | -0.41218200 | -0.00002700 |
|                           | N                        | -2.98629000 | 0.41217200  | 0.00001700  |
|                           | H                        | 3.72758700  | 0.26763900  | 0.00007400  |
|                           | H                        | 3.20991400  | -1.39016100 | 0.00008400  |
|                           | H                        | -3.72758700 | -0.26765700 | -0.00009500 |
|                           | H                        | -3.20993100 | 1.39014900  | -0.00008200 |
|                           | <b>2NH<sub>2</sub>-S</b> | C           | -1.71510000 | 0.38028200  |
| H                         |                          | -0.72935700 | 0.84712400  | -0.00034100 |
| S                         |                          | -1.90766300 | -1.24448500 | 0.00000300  |
| C                         |                          | 1.71509900  | -0.38028200 | 0.00019100  |
| S                         |                          | 1.90766400  | 1.24448600  | 0.00001100  |
| H                         |                          | 0.72935700  | -0.84712300 | 0.00057800  |
| N                         |                          | 2.70902100  | -1.27771700 | -0.00008900 |
| N                         |                          | -2.70902200 | 1.27771600  | 0.00000700  |
| H                         |                          | 3.66674000  | -0.96393000 | -0.00046900 |
| H                         |                          | 2.51312800  | -2.26402000 | 0.00002000  |
| H                         |                          | -3.66674100 | 0.96392800  | 0.00021800  |
| H                         |                          | -2.51313000 | 2.26401900  | -0.00006300 |
| <b>2NH<sub>2</sub>-Se</b> |                          | C           | -1.50760300 | 0.93023500  |
|                           | H                        | -0.42177100 | 1.01896500  | -0.00420600 |
|                           | Se                       | -2.31836900 | -0.65665800 | -0.00042300 |
|                           | C                        | 1.50761200  | -0.93024300 | 0.00002000  |
|                           | Se                       | 2.31835900  | 0.65666000  | -0.00041700 |

|                           |                   |             |             |             |
|---------------------------|-------------------|-------------|-------------|-------------|
|                           | H                 | 0.42177700  | -1.01898900 | -0.00117600 |
|                           | N                 | 2.12246800  | -2.11502500 | 0.00184100  |
|                           | N                 | -2.12243600 | 2.11502500  | 0.00217800  |
|                           | H                 | 3.12980600  | -2.16026700 | 0.00310000  |
|                           | H                 | 1.59271800  | -2.97096900 | 0.00199700  |
|                           | H                 | -3.12977000 | 2.16028200  | 0.00537200  |
|                           | H                 | -1.59267300 | 2.97096000  | 0.00172300  |
| <b>2NH<sub>2</sub>-Te</b> | C                 | 1.31779300  | -1.17773900 | -0.00088100 |
|                           | H                 | 0.23840900  | -1.03286300 | -0.00311600 |
|                           | Te                | 2.56673600  | 0.36157600  | -0.00040500 |
|                           | C                 | -1.31770400 | 1.17763700  | 0.00269100  |
|                           | Te                | -2.56680400 | -0.36155000 | -0.00041600 |
|                           | H                 | -0.23835500 | 1.03254000  | 0.00551800  |
|                           | N                 | -1.65103500 | 2.46692700  | 0.00106900  |
|                           | N                 | 1.65134300  | -2.46698000 | 0.00208300  |
|                           | H                 | -2.62110300 | 2.74357900  | -0.00190100 |
|                           | H                 | -0.94105400 | 3.18245800  | 0.00247800  |
|                           | H                 | 2.62145800  | -2.74347100 | 0.00475400  |
| H                         | 0.94148300        | -3.18263300 | 0.00204200  |             |
| <b>Monomer</b>            | <b>Coordinate</b> |             |             |             |
| <b>HCHO</b>               | C                 | 0.00000000  | 0.00000000  | -0.53209500 |
|                           | O                 | 0.00000000  | 0.00000000  | 0.67675400  |
|                           | H                 | 0.00000000  | 0.93593200  | -1.11073200 |
|                           | H                 | 0.00000000  | -0.93593200 | -1.11073200 |
| <b>HCHS</b>               | C                 | 0.00000000  | 0.00000000  | -1.02440400 |
|                           | S                 | 0.00000000  | 0.00000000  | 0.58403200  |
|                           | H                 | 0.00000000  | 0.92238700  | -1.59904100 |
|                           | H                 | 0.00000000  | -0.92238700 | -1.59904100 |
| <b>HCHSe</b>              | C                 | 0.00000000  | 0.00000000  | -1.39048600 |
|                           | Se                | 0.00000000  | 0.00000000  | 0.36039000  |
|                           | H                 | 0.00000000  | 0.92564900  | -1.95517500 |
|                           | H                 | 0.00000000  | -0.92564900 | -1.95517500 |
| <b>HCHTe</b>              | C                 | 1.66859200  | 0.00000000  | 0.00003600  |
|                           | H                 | 2.23150200  | -0.92570400 | 0.00001600  |
|                           | H                 | 2.23150200  | 0.92570400  | 0.00005400  |
|                           | Te                | -0.27835700 | 0.00000000  | -0.00000500 |
| <b>FCHO</b>               | C                 | 0.00000000  | 0.39750100  | 0.00000000  |
|                           | O                 | 1.14956500  | 0.12302900  | 0.00000000  |
|                           | H                 | -0.45235100 | 1.38994600  | 0.00000000  |
|                           | F                 | -0.97157400 | -0.52879800 | 0.00000000  |
| <b>FCHS</b>               | C                 | 0.00000000  | 0.63370800  | 0.00000000  |
|                           | S                 | -0.71382500 | -0.78914500 | 0.00000000  |
|                           | H                 | -0.48892500 | 1.60366900  | 0.00000000  |
|                           | F                 | 1.32334700  | 0.80226700  | 0.00000000  |



|                           |    |             |             |             |
|---------------------------|----|-------------|-------------|-------------|
| <b>FCHSe</b>              | C  | 0.43350600  | -0.95722200 | 0.00000000  |
|                           | Se | 0.00000000  | 0.72573100  | 0.00000000  |
|                           | H  | 1.44508200  | -1.35184700 | 0.00000000  |
|                           | F  | -0.44956800 | -1.95329700 | 0.00000000  |
| <b>FCHTe</b>              | C  | -1.28586200 | 0.50590600  | 0.00003400  |
|                           | H  | -1.64491400 | 1.53119900  | -0.00001300 |
|                           | Te | 0.57945800  | -0.02742500 | -0.00001000 |
|                           | F  | -2.30797100 | -0.34894600 | 0.00003500  |
| <b>ClCHO</b>              | C  | 0.00000000  | 0.78814300  | 0.00000000  |
|                           | O  | 1.13124600  | 1.14948500  | 0.00000000  |
|                           | H  | -0.88364200 | 1.43154700  | 0.00000000  |
|                           | Cl | -0.48037200 | -0.90331100 | 0.00000000  |
| <b>ClCHS</b>              | C  | 0.00000000  | 0.60771800  | 0.00000000  |
|                           | S  | 1.51237300  | 0.08399200  | 0.00000000  |
|                           | H  | -0.28177600 | 1.65624000  | 0.00000000  |
|                           | Cl | -1.40683500 | -0.39096500 | 0.00000000  |
| <b>ClCHSe</b>             | C  | 0.00000000  | 0.81859000  | 0.00000000  |
|                           | Se | -0.83457000 | -0.71668900 | 0.00000000  |
|                           | H  | -0.52196200 | 1.76958300  | 0.00000000  |
|                           | Cl | 1.69984300  | 1.04037100  | 0.00000000  |
| <b>ClCHTe</b>             | C  | -0.90470400 | 0.69168300  | -0.00002000 |
|                           | H  | -1.08502600 | 1.76164500  | 0.00005200  |
|                           | Te | 0.89883700  | -0.04901900 | 0.00000100  |
|                           | Cl | -2.36625200 | -0.19781000 | 0.00000200  |
| <b>BrCHO</b>              | C  | 0.37600500  | -1.19155300 | 0.00000000  |
|                           | O  | -0.46418100 | -2.02818900 | 0.00000000  |
|                           | H  | 1.45741200  | -1.35567200 | 0.00000000  |
|                           | Br | 0.00000000  | 0.70658600  | 0.00000000  |
| <b>BrCHS</b>              | C  | 0.00000000  | 0.94129300  | 0.00000000  |
|                           | S  | 1.54457600  | 1.34984600  | 0.00000000  |
|                           | H  | -0.82196900 | 1.65028900  | 0.00000000  |
|                           | Br | -0.68260700 | -0.82558800 | 0.00000000  |
| <b>BrCHSe</b>             | C  | 0.00000000  | 0.73332300  | 0.00000000  |
|                           | Se | 1.63320000  | 0.11368700  | 0.00000000  |
|                           | H  | -0.23008900 | 1.79331300  | 0.00000000  |
|                           | Br | -1.57996300 | -0.28738900 | 0.00000000  |
| <b>BrCHTe</b>             | C  | 0.35773500  | 0.77566000  | -0.00009300 |
|                           | H  | 0.48591100  | 1.85282500  | 0.00025900  |
|                           | Te | -1.40352700 | -0.05923000 | 0.00004100  |
|                           | Br | 2.01003100  | -0.09790900 | -0.00005200 |
| <b>CH<sub>3</sub>CHO</b>  | C  | 0.00000000  | 0.46100400  | 0.00000000  |
|                           | H  | -0.48062600 | 1.45696300  | 0.00000000  |
|                           | O  | 1.20797400  | 0.37025400  | 0.00000000  |
|                           | C  | -0.93792900 | -0.70702900 | 0.00000000  |
|                           | H  | -1.58425600 | -0.65026400 | 0.87628800  |
|                           | H  | -1.58425600 | -0.65026400 | -0.87628800 |
|                           | H  | -0.38707800 | -1.64231900 | 0.00000000  |
| <b>CH<sub>3</sub>CHS</b>  | C  | 0.00000000  | 0.62198800  | 0.00000000  |
|                           | H  | 0.51304800  | 1.58502200  | 0.00000000  |
|                           | S  | 0.87625400  | -0.73301200 | 0.00000000  |
|                           | C  | -1.48953100 | 0.69853800  | 0.00000000  |
|                           | H  | -1.82901500 | 1.25543900  | 0.87550900  |
|                           | H  | -1.82901500 | 1.25543900  | -0.87550900 |
|                           | H  | -1.93790300 | -0.29085900 | 0.00000000  |
| <b>CH<sub>3</sub>CHSe</b> | C  | -0.48839400 | -0.91198400 | 0.00000000  |
|                           | H  | -1.55310500 | -1.13967000 | 0.00000000  |
|                           | Se | 0.00000000  | 0.77478800  | 0.00000000  |

|                           |    |             |             |             |
|---------------------------|----|-------------|-------------|-------------|
|                           | C  | 0.42631900  | -2.08767100 | 0.00000000  |
|                           | H  | 0.22796900  | -2.71016900 | 0.87549900  |
|                           | H  | 0.22796900  | -2.71016900 | -0.87549900 |
|                           | H  | 1.46961600  | -1.78483600 | 0.00000000  |
| <b>CH<sub>3</sub>CHTe</b> | C  | -1.24017000 | 0.57212000  | -0.00001400 |
|                           | H  | -1.41820300 | 1.64526600  | 0.00003100  |
|                           | Te | 0.61389700  | -0.03521100 | 0.00000000  |
|                           | C  | -2.45373900 | -0.29249900 | 0.00000200  |
|                           | H  | -2.20154800 | -1.34972300 | -0.00000400 |
|                           | H  | -3.06969500 | -0.07113900 | 0.87555300  |
|                           | H  | -3.06971800 | -0.07113400 | -0.87553100 |
| <b>NH<sub>2</sub>CHO</b>  | C  | 0.16001300  | 0.38881800  | -0.00001200 |
|                           | O  | 1.19477800  | -0.24582400 | -0.00002200 |
|                           | H  | 0.13446000  | 1.48897900  | -0.00003200 |
|                           | N  | -1.08169200 | -0.15900100 | 0.00002700  |
|                           | H  | -1.17845800 | -1.16018200 | 0.00005100  |
|                           | H  | -1.90246300 | 0.41788900  | 0.00004100  |
| <b>NH<sub>2</sub>CHS</b>  | C  | -0.40896800 | 0.48502100  | 0.00000300  |
|                           | S  | 1.10870000  | -0.10586000 | 0.00000100  |
|                           | H  | -0.60616400 | 1.55642200  | -0.00000200 |
|                           | N  | -1.53734000 | -0.24485600 | -0.00001400 |
|                           | H  | -1.47520200 | -1.25050600 | 0.00002800  |
|                           | H  | -2.44264200 | 0.19170700  | 0.00004400  |
| <b>NH<sub>2</sub>CHSe</b> | C  | -0.92771500 | 0.51207500  | -0.00000400 |
|                           | Se | 0.75570000  | -0.04697200 | 0.00000000  |
|                           | H  | -1.16778200 | 1.57271800  | 0.00000100  |
|                           | N  | -2.01584100 | -0.27068700 | 0.00000600  |
|                           | H  | -1.90587700 | -1.27275900 | -0.00001800 |
|                           | H  | -2.94295900 | 0.11944500  | -0.00000500 |
| <b>NH<sub>2</sub>CHTe</b> | C  | -1.29339400 | 0.52318000  | -0.00002600 |
|                           | H  | -1.56357900 | 1.57566800  | 0.00005600  |
|                           | Te | 0.60261200  | -0.02823300 | 0.00000100  |
|                           | N  | -2.35639700 | -0.28979700 | -0.00000700 |
|                           | H  | -2.22076500 | -1.28933000 | 0.00001700  |
|                           | H  | -3.29633500 | 0.07128400  | 0.00007000  |
